# Supplementary material for: Data for whole and mitochondrial proteome of human embryonic stem cells
Source: PubMed Central journal article supplement (PMC5480819; doi:10.1016/j.dib.2017.05.036), 2017-06-12
Supplement: mmc2.pdf [file mmc2.pdf]

**ESC repeat1**

**ESC repeat2**

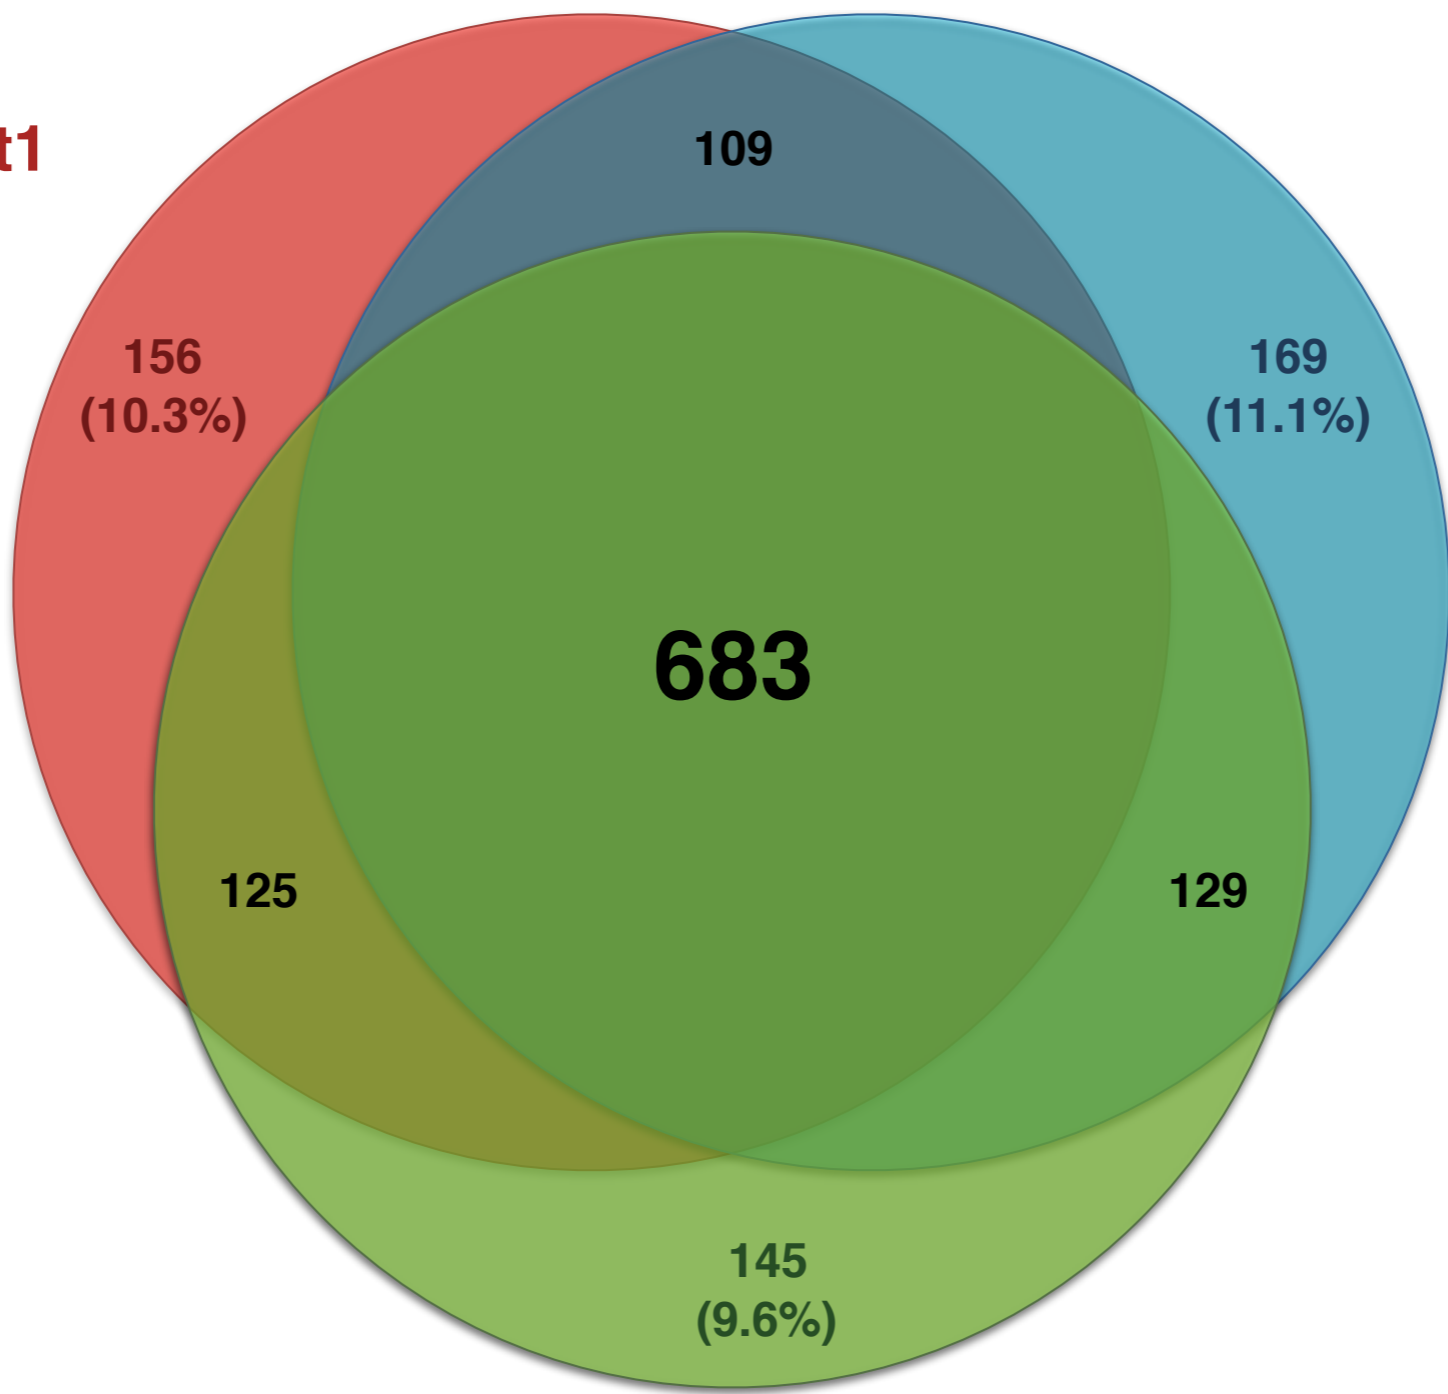

**ESC repeat3**
